# Supplementary material for: Sea ice variations and trends during the Common Era in the Atlantic sector of the Arctic Ocean
Source: Copernicus journal article supplement (doi:10.5194/egusphere-2023-1327), 2023-07-07
Supplement: Supplementary file 1 [file egusphere-2023-1327-supplement.pdf]

# Sea ice variations and trends during the Common Era in the Atlantic sector of the Arctic Ocean

Ana Lúcia Lindroth Dauner<sup>1</sup>, Frederik Schenk<sup>2,3,4</sup>, Katherine Elizabeth Power<sup>3,5</sup>, Majja P. Heikkilä<sup>1,6</sup>

5 <sup>1</sup>Environmental Change Research Unit (ECRU), Ecosystems and Environment Research Programme, Faculty of Biological and Environmental Sciences, University of Helsinki, Helsinki, 00014, Finland

<sup>2</sup>Department of Geosciences and Geography, University of Helsinki, Helsinki, 00014, Finland

<sup>3</sup>Bolin Centre for Climate Research, Stockholm University, Stockholm, 10691, Sweden

<sup>4</sup>Department of Geological Sciences, Stockholm University, Stockholm, 10691, Sweden

<sup>5</sup>Department of Physical Geography, Stockholm University, Stockholm, 10691, Sweden

10 <sup>6</sup>Helsinki Institute of Sustainability Science (HELSUS), University of Helsinki, Helsinki, 00014, Finland

*Correspondence to:* Ana Lúcia Lindroth Dauner (ana.lindrothdauner@helsinki.fi; anadauner@gmail.com)

Figures

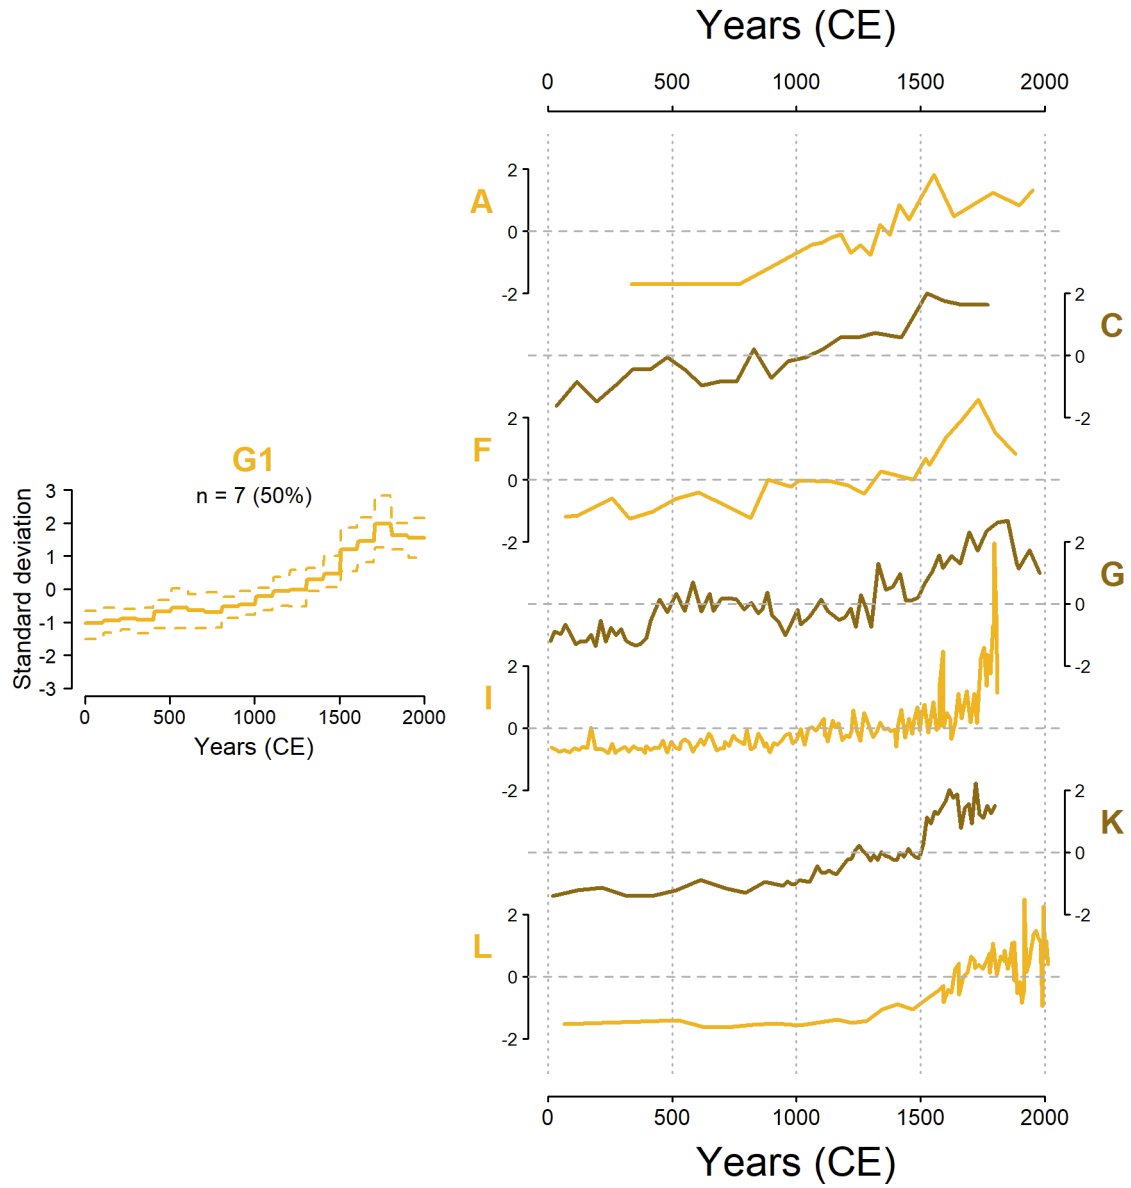

15 Figure S1. Original data from the records from Group 1 (cluster analysis after removing the global trend).

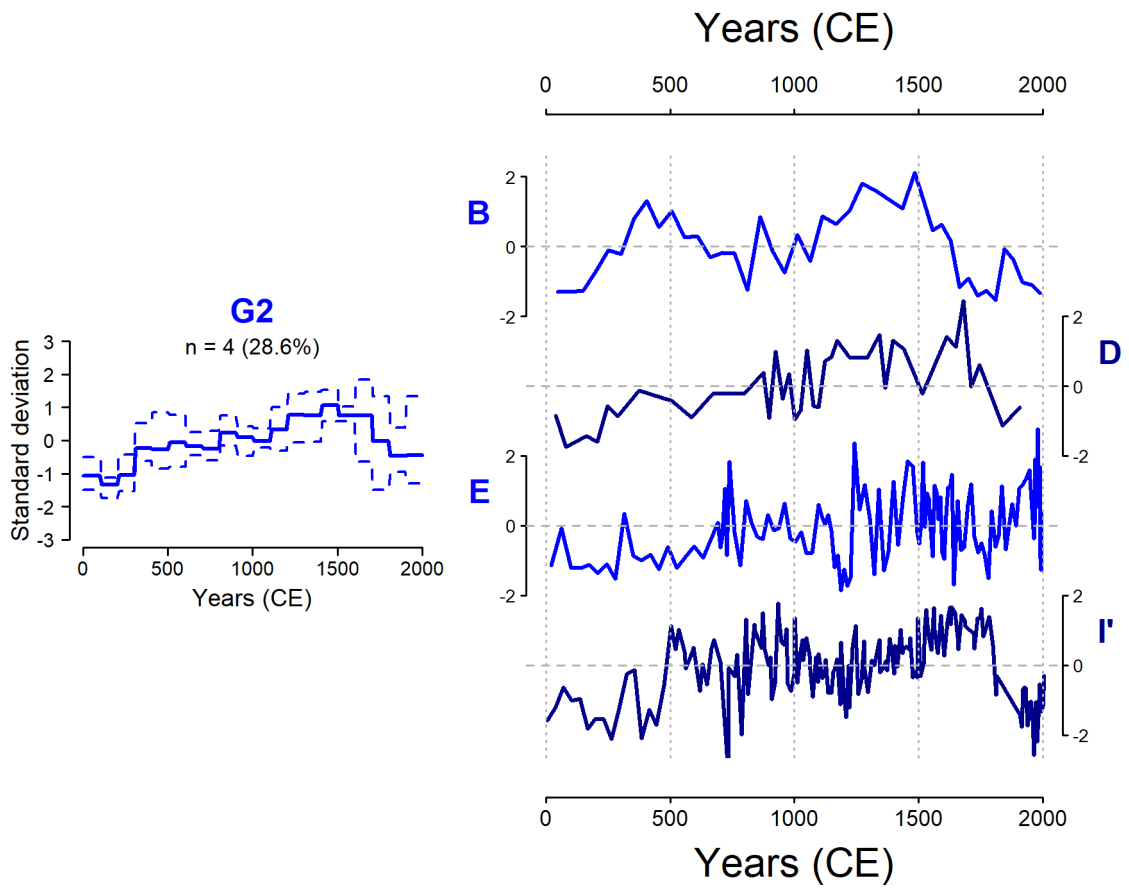

Figure S2. Original data from the records from Group 2 (cluster analysis after removing the global trend).

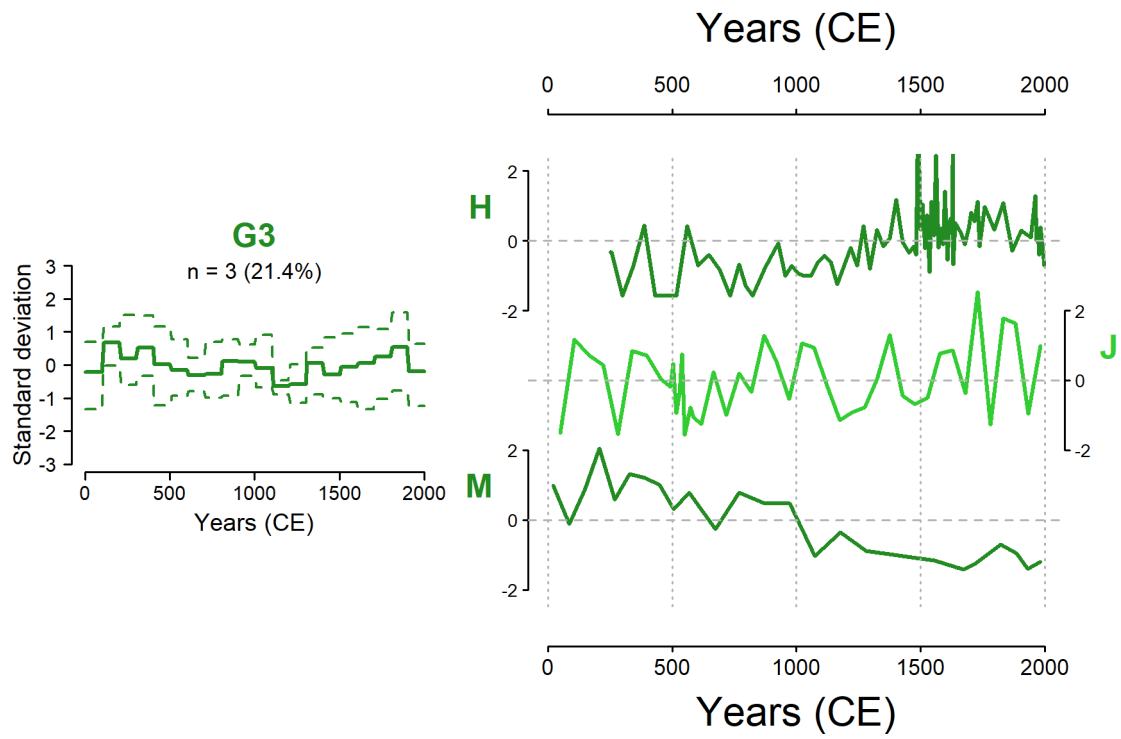

**Figure S3. Original data from the records from Group 3 (cluster analysis after removing the global trend).**

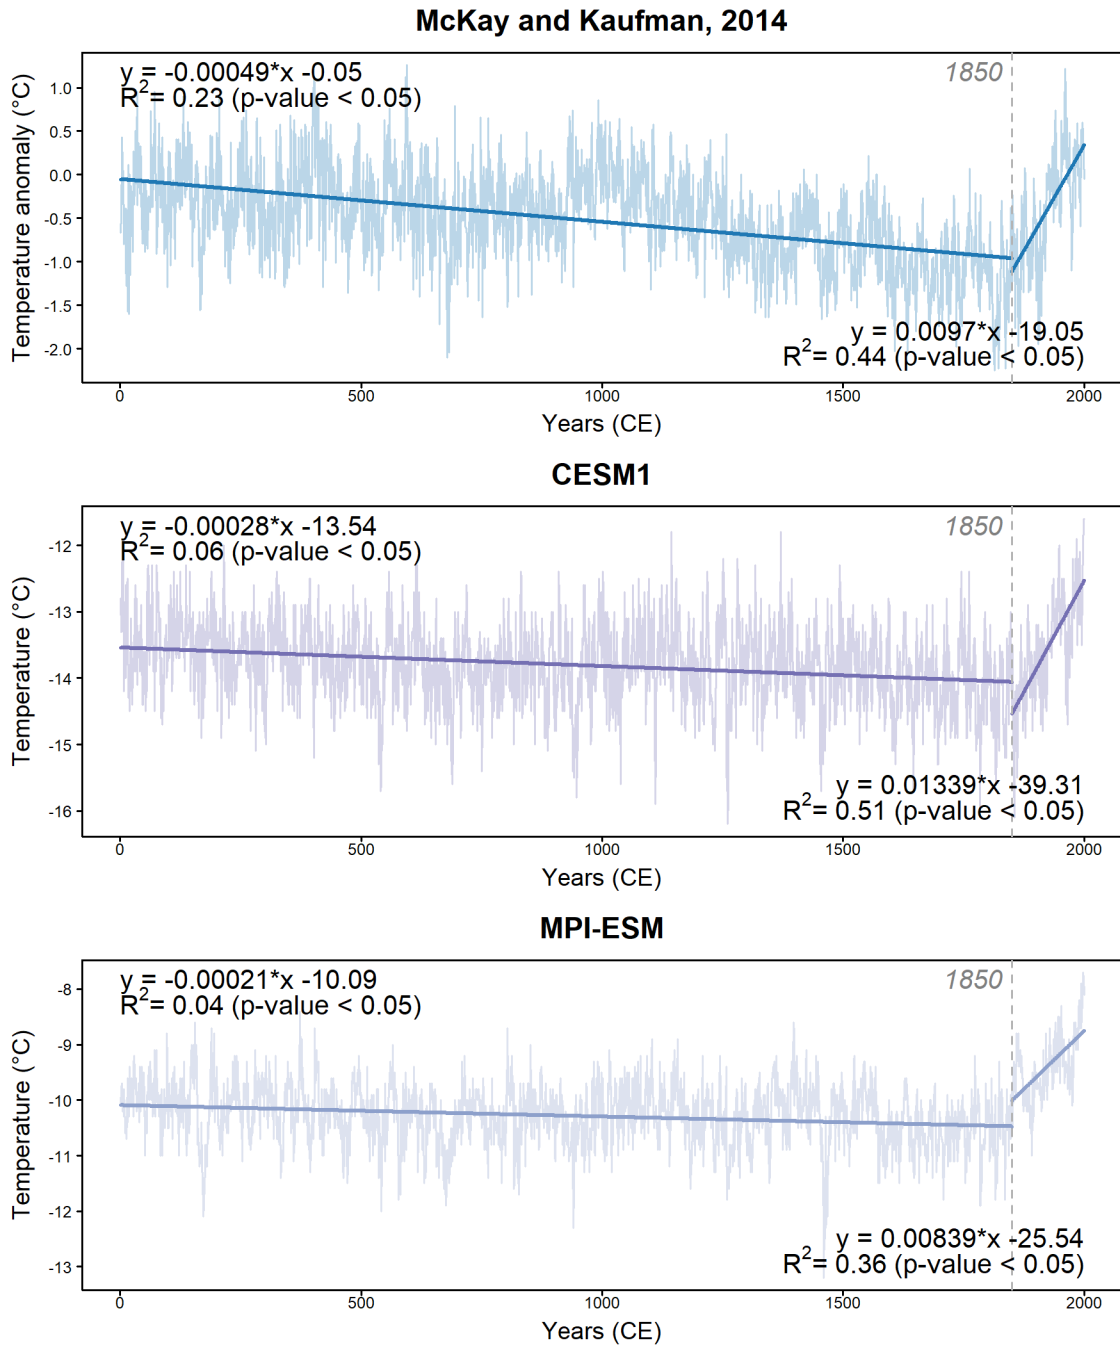

**Figure S4. Arctic (latitudes > 60° N) air temperatures based on McKay and Kaufman (2014) and on numerical models CESM1 and MPI-ESM data.**

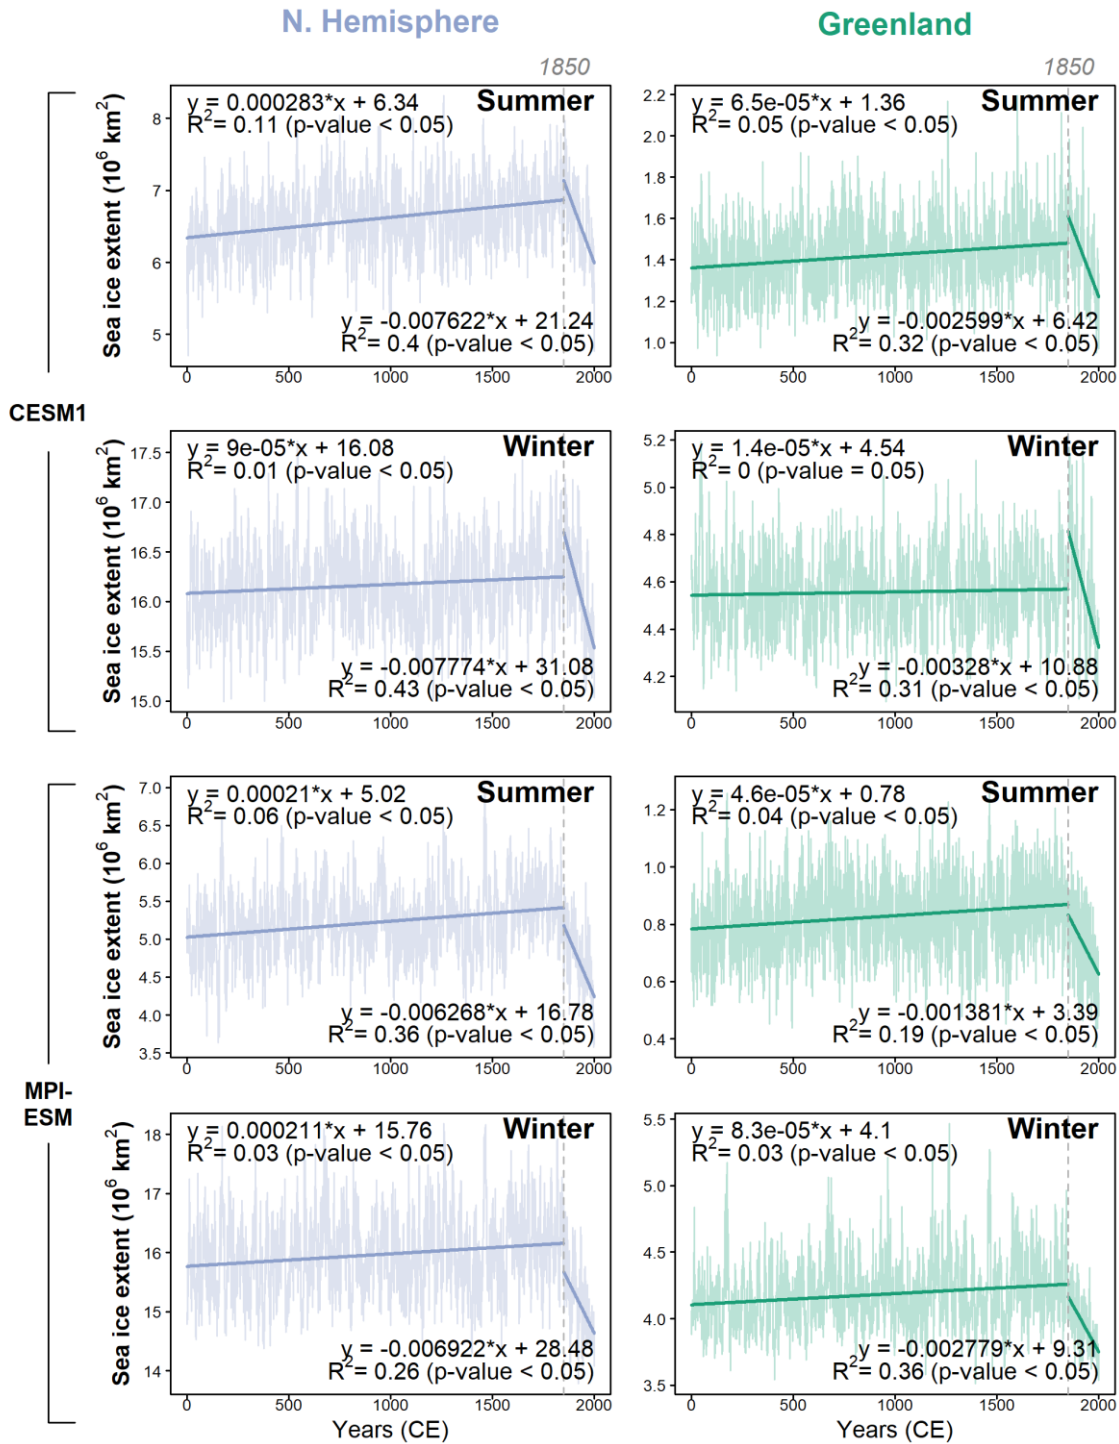

Figure S5. Sea ice extent trends based on numerical models CESM1 and MPI-ESM data, considering the Northern Hemisphere (left column) and region around Greenland (right column), and summer (minimum extent) and winter (maximum extent) seasons.

# CESM1

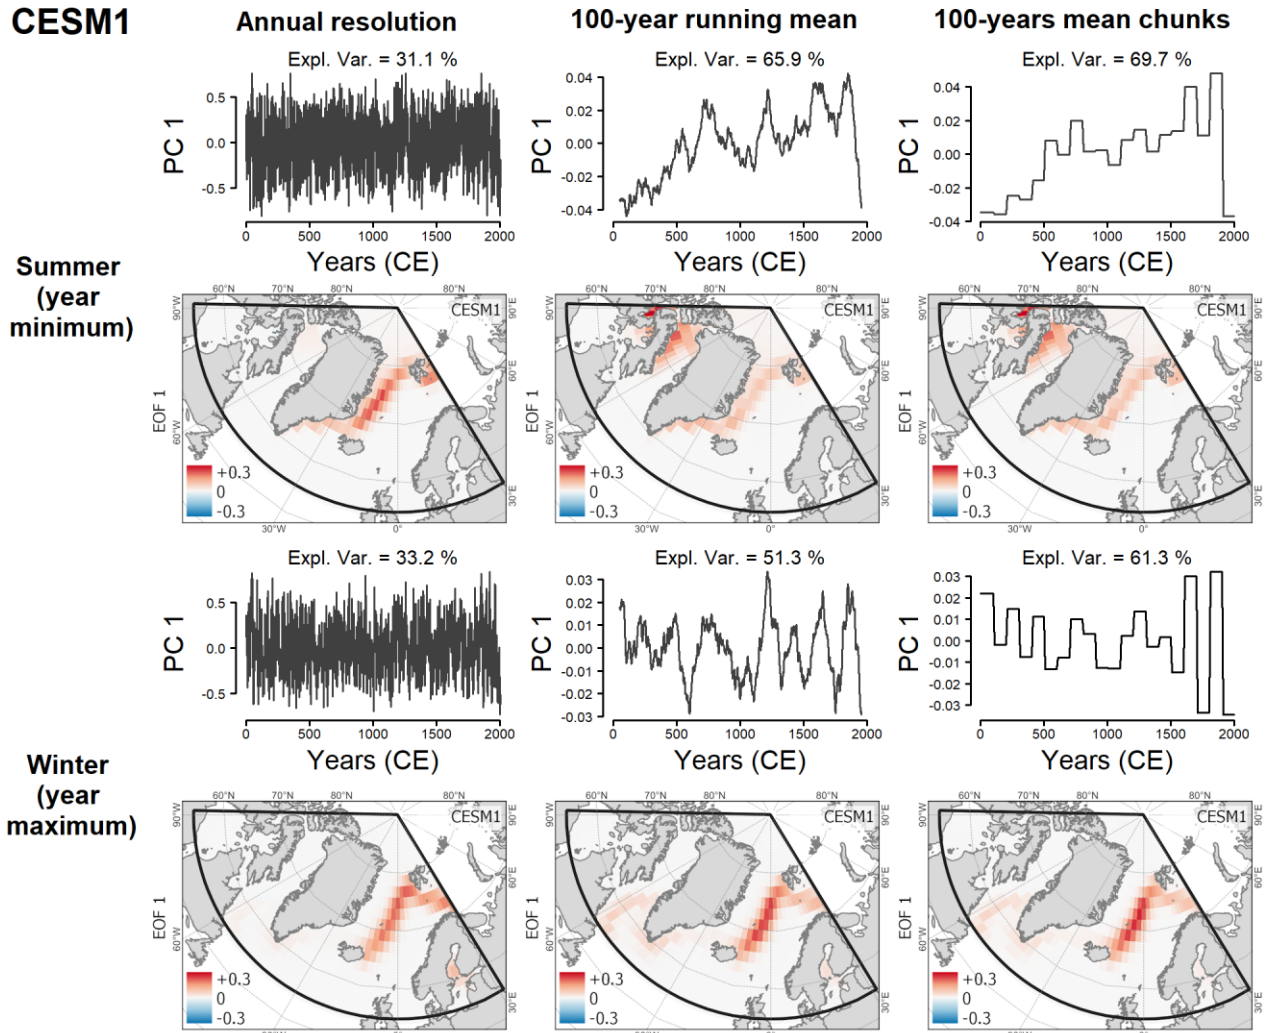

35 Figure S6. Results of empirical orthogonal function (EOF) analysis (PC1: normalized first principal component; EOF1: first EOF mode loadings) of the sea ice fraction based on CESM1 data, considering summer and winter seasons. First column: Data with annual resolution. Second column: 100-year running mean data. Third column: 100-years mean chunks data.

# MPI-ESM

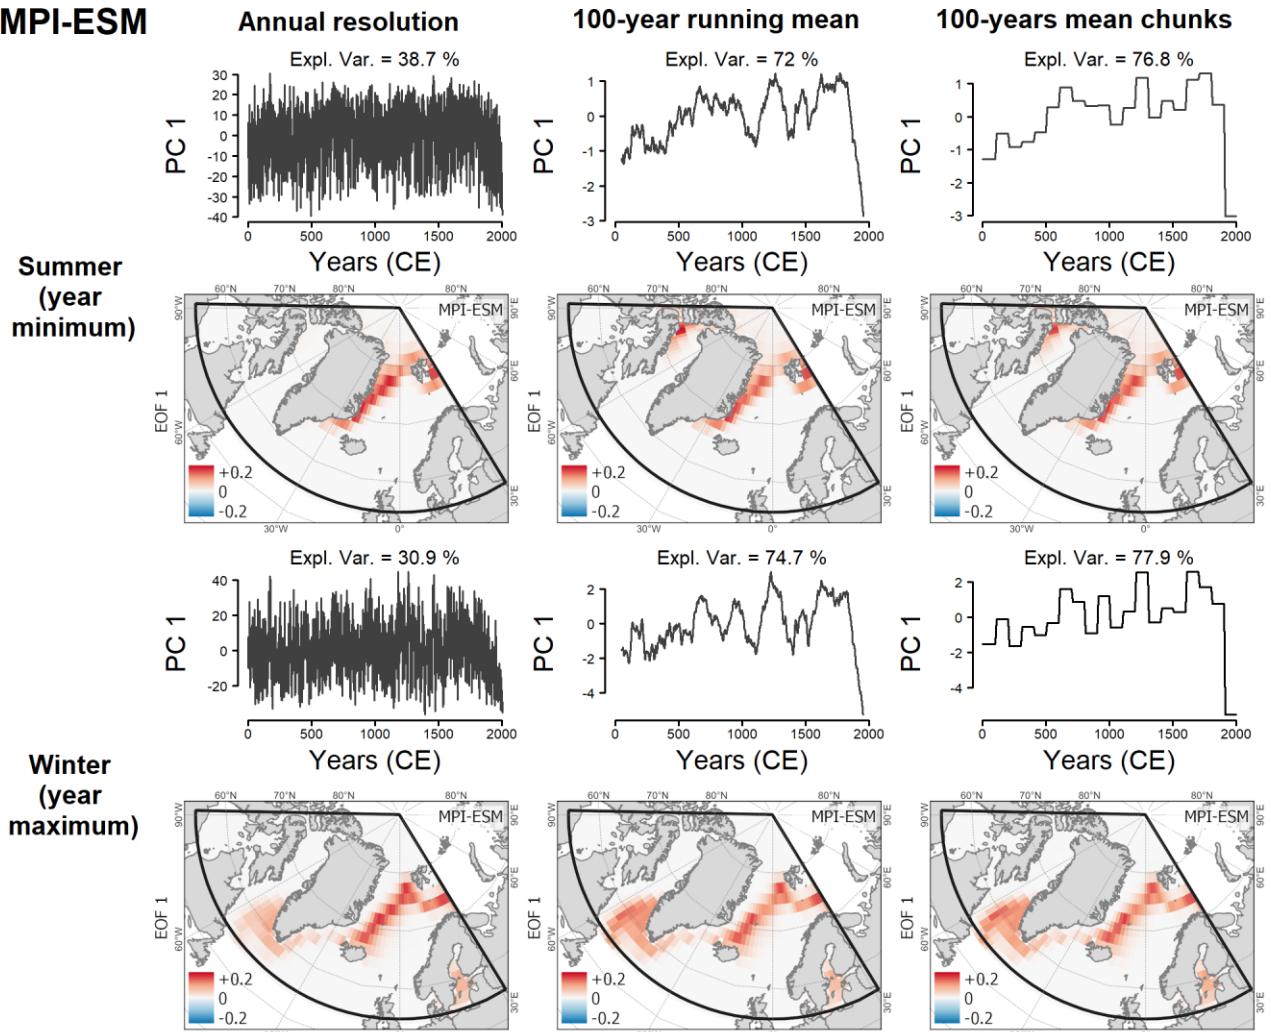

40

**Figure S7. Results of empirical orthogonal function (EOF) analysis (PC1: normalized first principal component; EOF1: first EOF mode loadings) of the sea ice fraction based on MPI-ESM data, considering summer and winter seasons. First column: Data with annual resolution. Second column: 100-year running mean data. Third column: 100-years mean chunks data.**



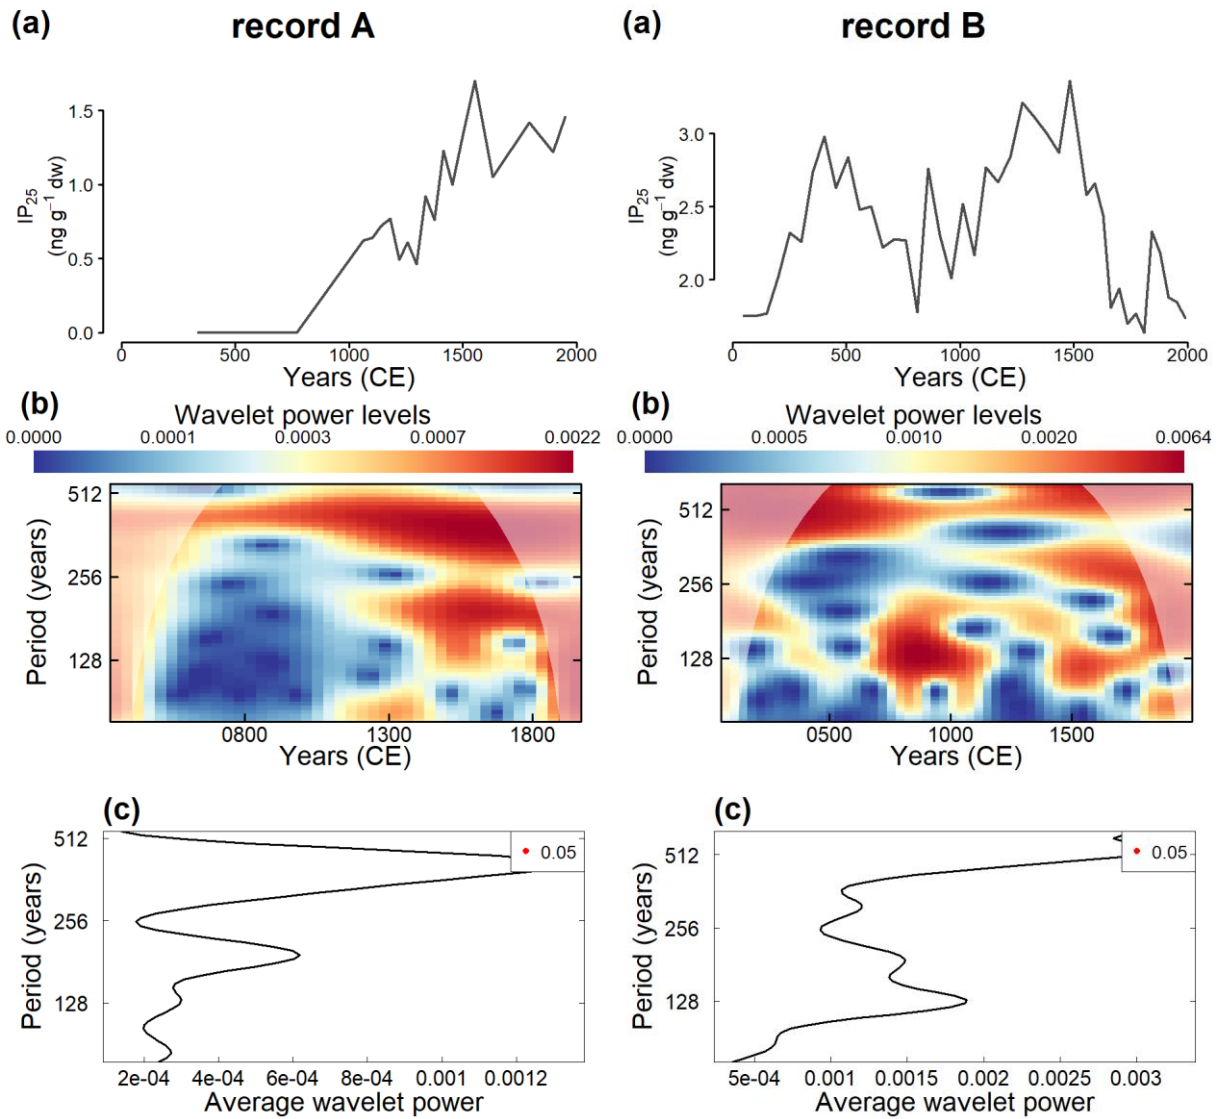

Figure S8. Wavelet analysis of sea ice reconstructions from records A and B. (a) Original time series. (b) Wavelet power spectrum and (c) global wavelet of the normalized signal on the time-frequency domain. Marked regions on the wavelet spectrum indicate significant power to a 95 % confidence interval. The areas under the cone of influence show where edge effects are important.

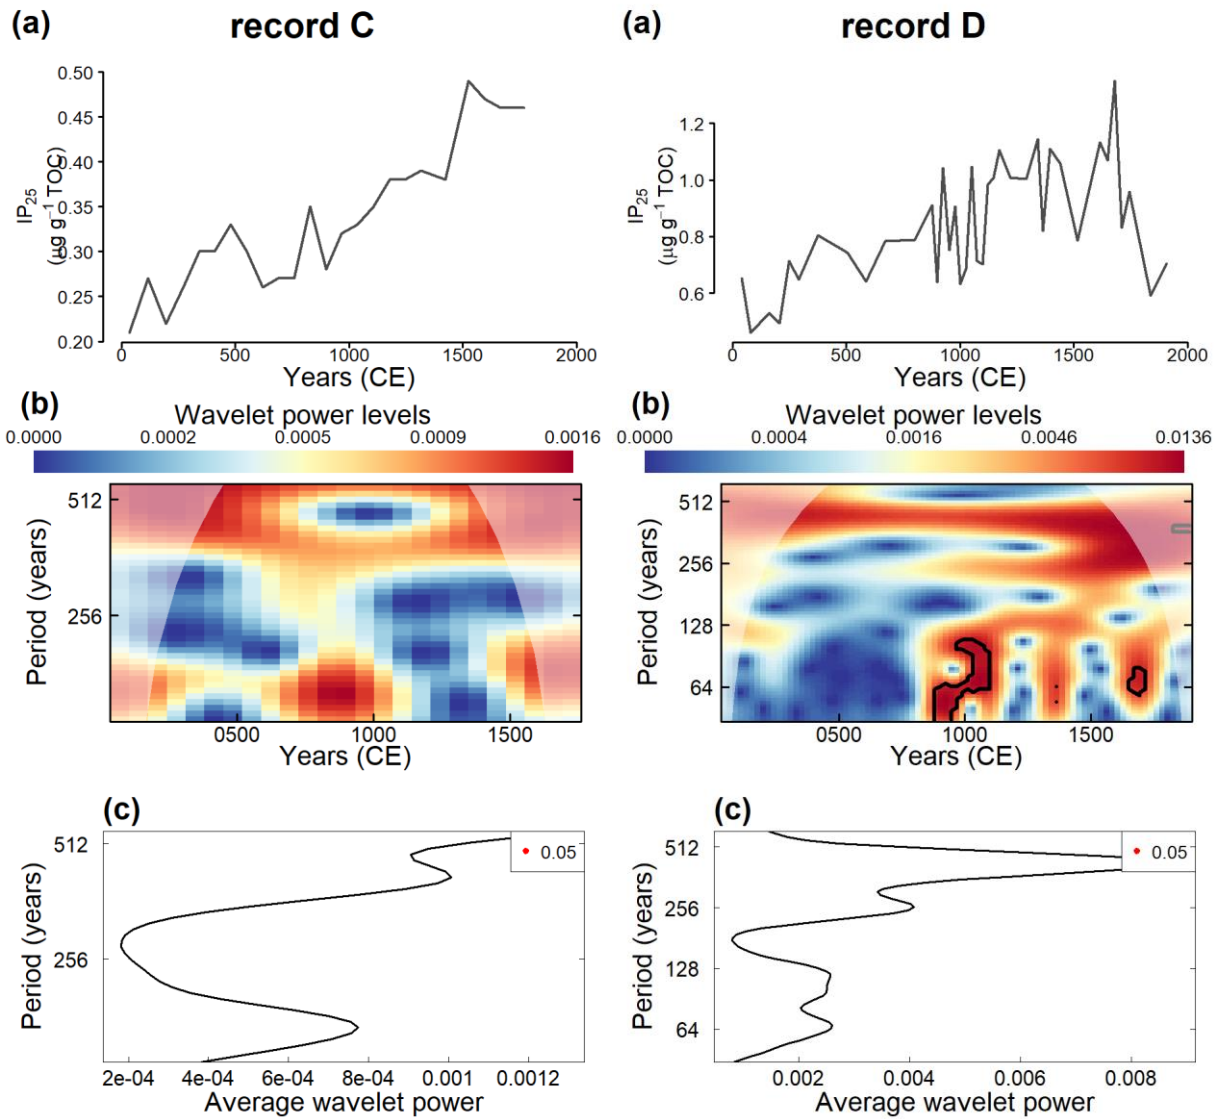

50

**Figure S9.** Wavelet analysis of sea ice reconstructions from records C and D. (a) Original time series. (b) Wavelet power spectrum and (c) global wavelet of the normalized signal on the time-frequency domain. Marked regions on the wavelet spectrum indicate significant power to a 95 % confidence interval. The areas under the cone of influence show where edge effects are important.

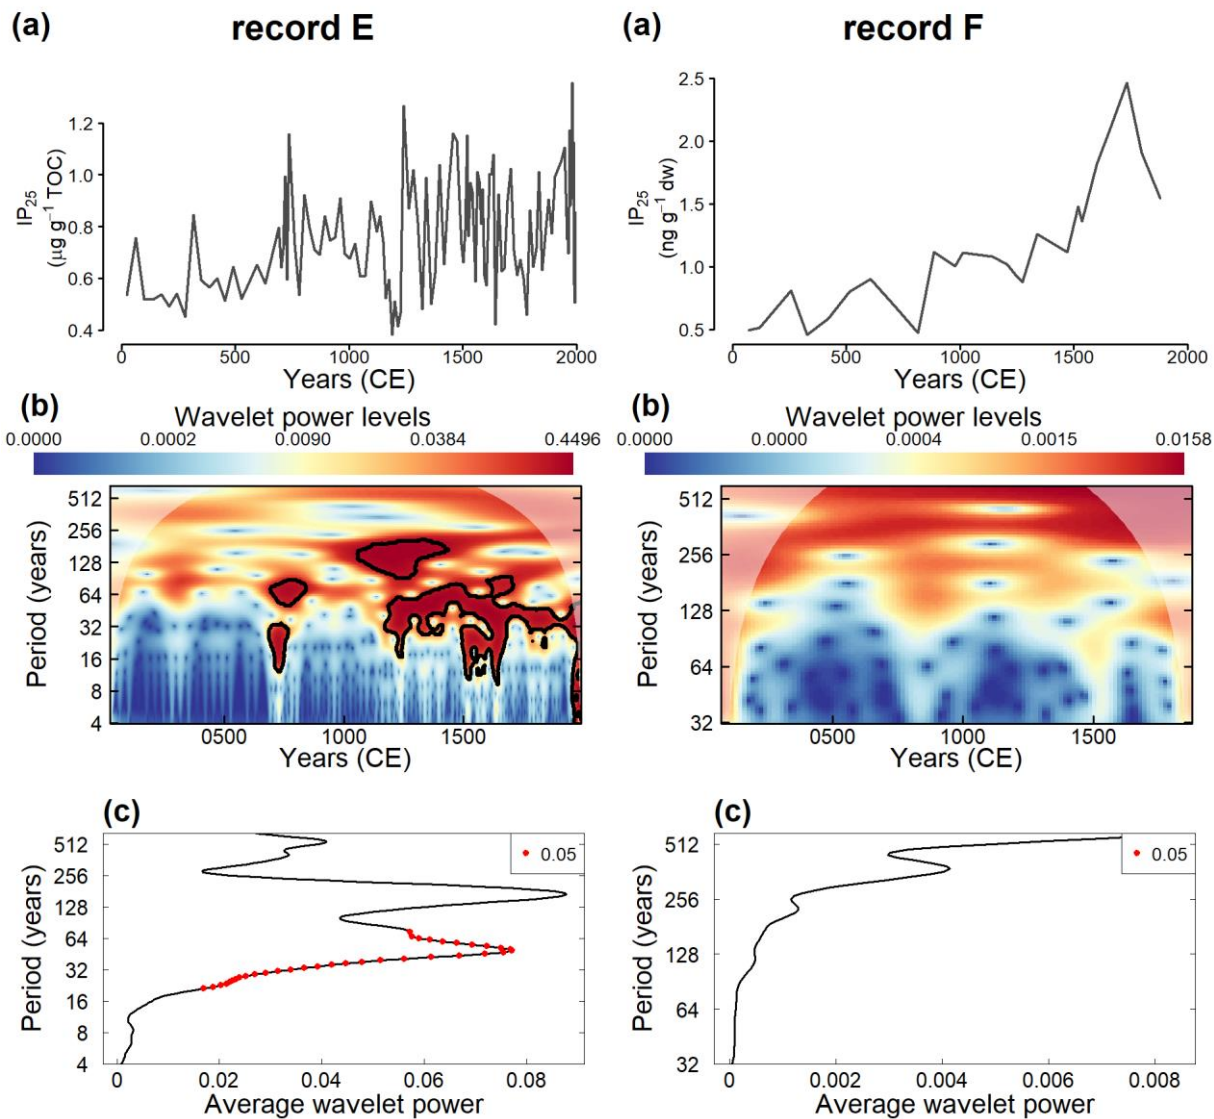

55

**Figure S10.** Wavelet analysis of sea ice reconstructions from records E and F. (a) Original time series. (b) Wavelet power spectrum and (c) global wavelet of the normalized signal on the time-frequency domain. Marked regions on the wavelet spectrum indicate significant power to a 95 % confidence interval. The areas under the cone of influence show where edge effects are important.

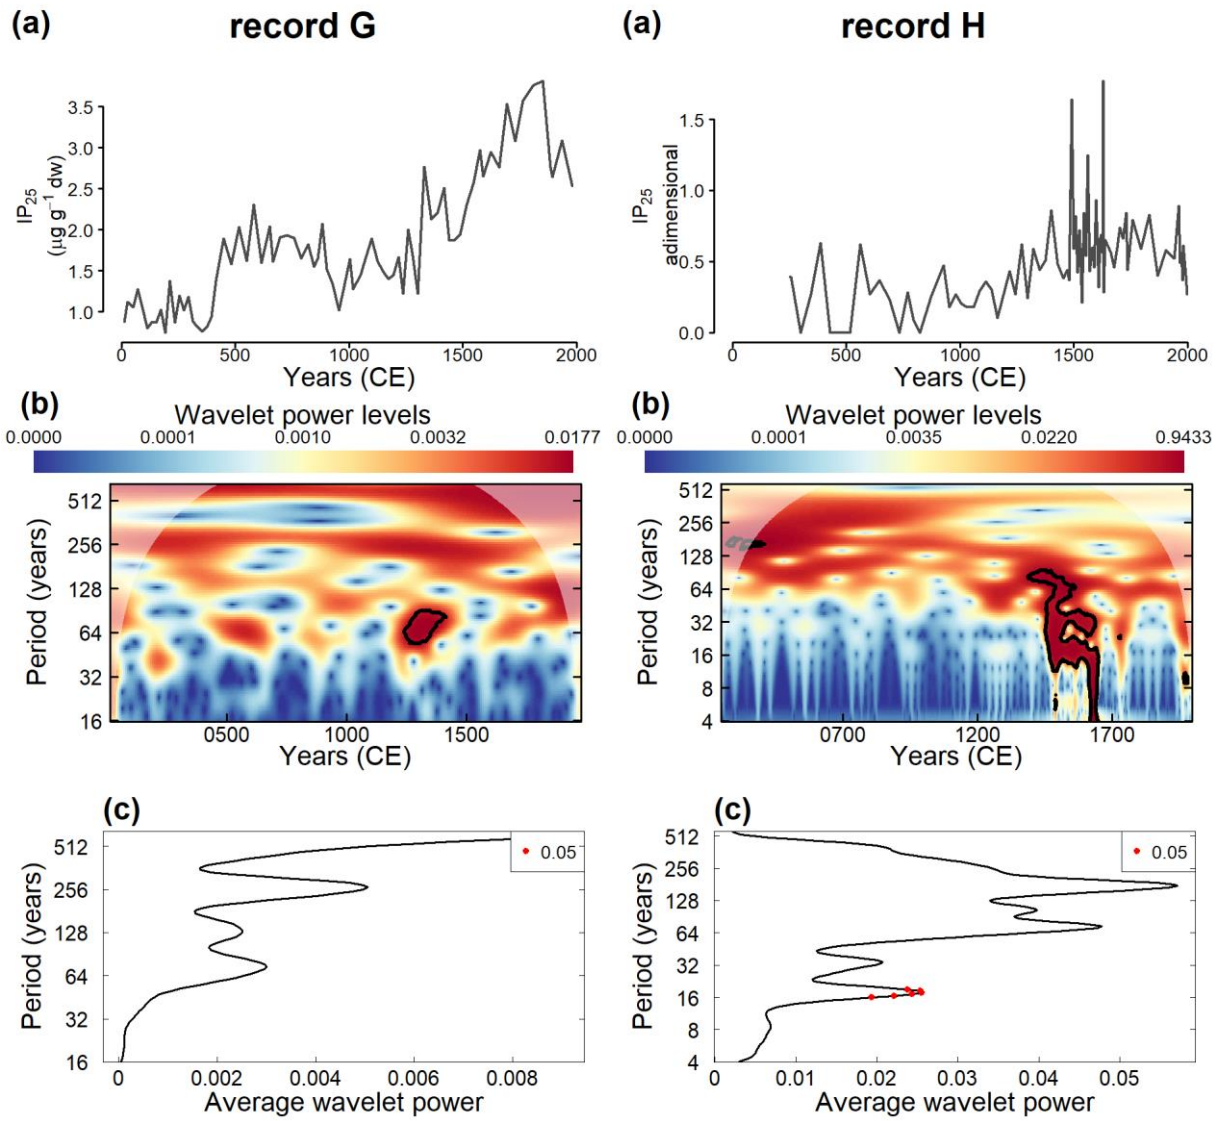

60

**Figure S11. Wavelet analysis of sea ice reconstructions from records G and H. (a) Original time series. (b) Wavelet power spectrum and (c) global wavelet of the normalized signal on the time-frequency domain. Marked regions on the wavelet spectrum indicate significant power to a 95 % confidence interval. The areas under the cone of influence show where edge effects are important.**

65

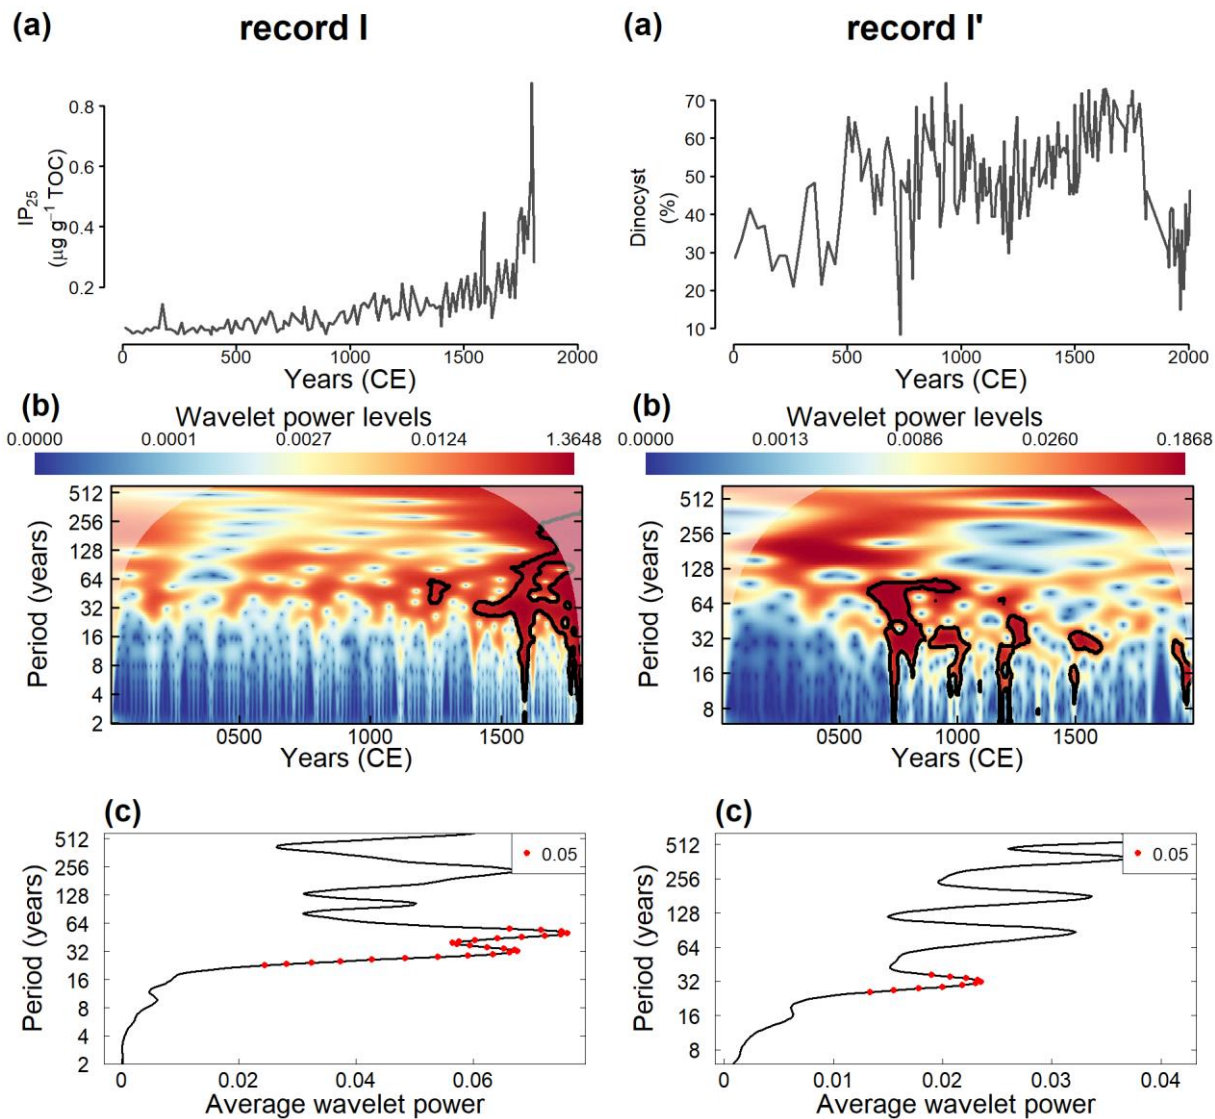

**Figure S12.** Wavelet analysis of sea ice reconstructions from records I and I'. (a) Original time series. (b) Wavelet power spectrum and (c) global wavelet of the normalized signal on the time-frequency domain. Marked regions on the wavelet spectrum indicate significant power to a 95 % confidence interval. The areas under the cone of influence show where edge effects are important.

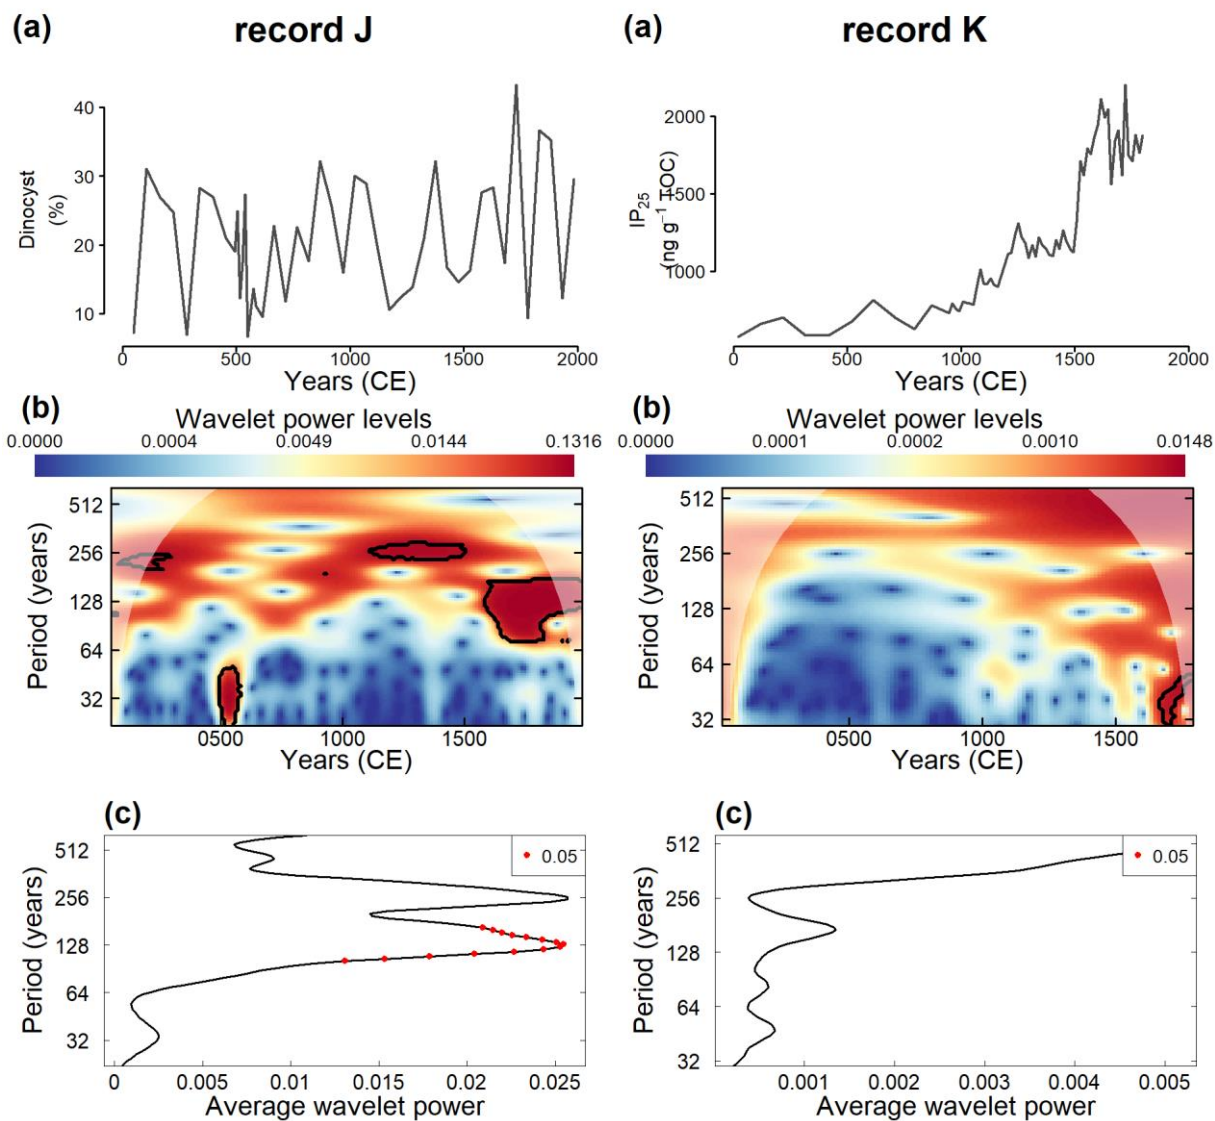

**Figure S13. Wavelet analysis of sea ice reconstructions from records J and K. (a) Original time series. (b) Wavelet power spectrum and (c) global wavelet of the normalized signal on the time-frequency domain. Marked regions on the wavelet spectrum indicate significant power to a 95 % confidence interval. The areas under the cone of influence show where edge effects are important.**

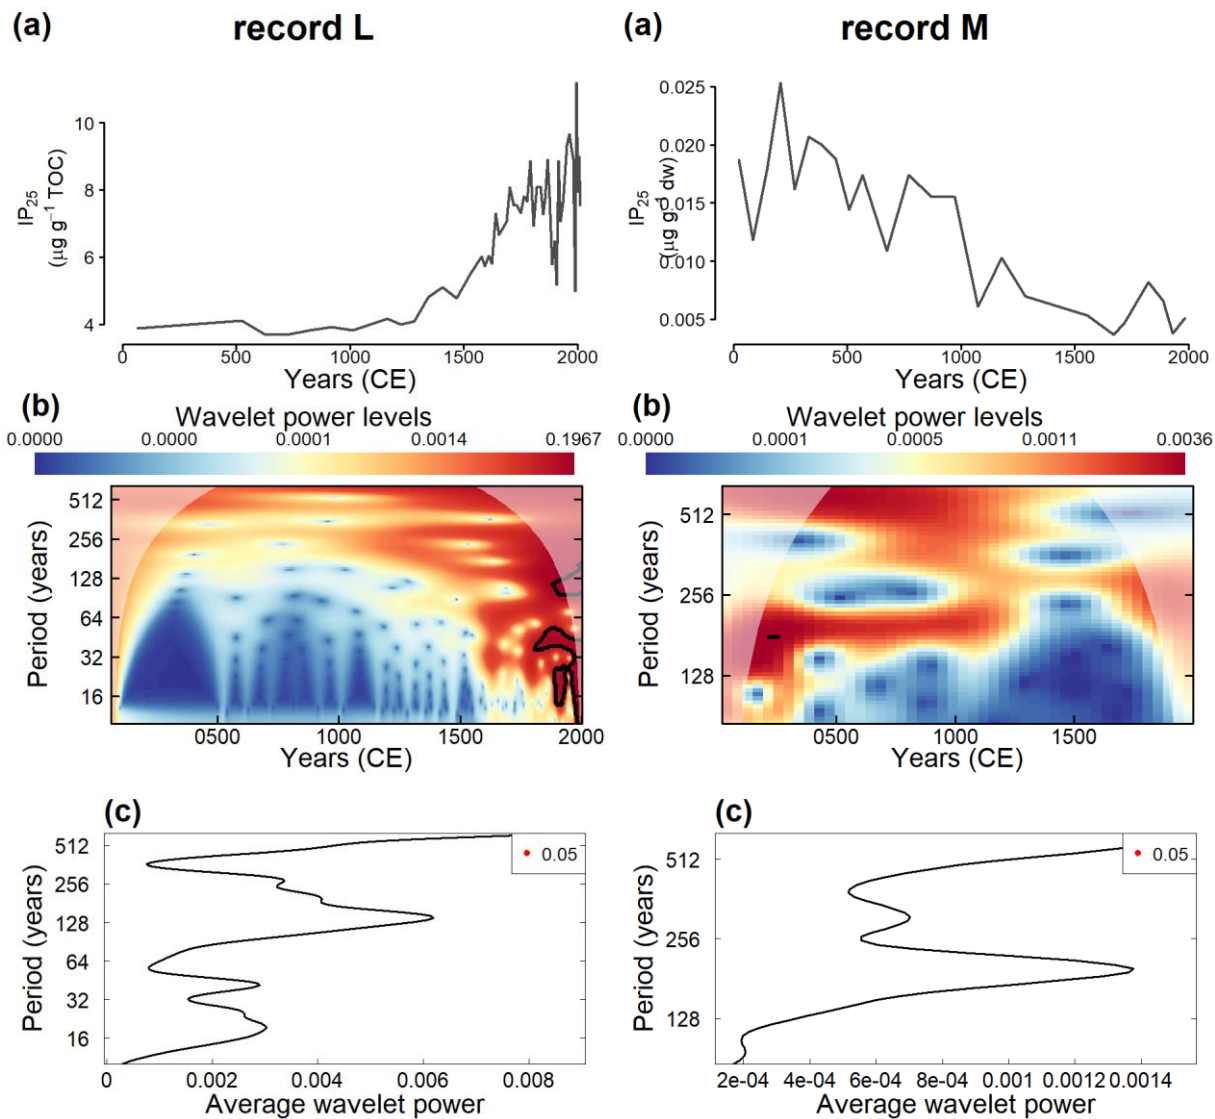

Figure S14. Wavelet analysis of sea ice reconstructions from records L and M. (a) Original time series. (b) Wavelet power spectrum and (c) global wavelet of the normalized signal on the time-frequency domain. Marked regions on the wavelet spectrum indicate significant power to a 95 % confidence interval. The areas under the cone of influence show where edge effects are important.

80
