# Supplementary material for: Sea ice variations and trends during the Common Era in the Atlantic sector of the Arctic Ocean
Source: Copernicus journal article supplement (doi:10.5194/egusphere-2023-1327), 2023-07-07
Supplement: Supplementary file [file egusphere-2023-1327-AC1-supplement.pdf]

| Sea-ice area<br>(10 <sup>6</sup> km <sup>2</sup> ) between<br>1979-2000 |        | Northern Hemisphere |                           |                 | Greenland       |                           |                 |
|-------------------------------------------------------------------------|--------|---------------------|---------------------------|-----------------|-----------------|---------------------------|-----------------|
|                                                                         |        | Minimum<br>area     | Annual<br>average<br>area | Maximum<br>area | Minimum<br>area | Annual<br>average<br>area | Maximum<br>area |
| <b>CESM1</b>                                                            | Summer | 4.8                 | 6.0                       | 6.6             | 0.9             | 1.2                       | 1.5             |
|                                                                         | Winter | 15.0                | 15.6                      | 16.2            | 4.1             | 4.3                       | 4.5             |
| <b>MPI-ESM</b>                                                          | Summer | 3.6                 | 4.2                       | 4.8             | 0.4             | 0.6                       | 0.8             |
|                                                                         | Winter | 14.1                | 14.6                      | 15.1            | 3.5             | 3.8                       | 4.0             |
| <b>Satellite<br/>data</b>                                               | Summer | 6.2                 | 7.1                       | 8.0             | 1.7             | 2.3                       | 2.6             |
|                                                                         | Winter | 15.7                | 16.2                      | 16.9            | 6.7             | 7.3                       | 7.7             |

Table S2. Comparison between simulated sea-ice areas (in million km<sup>2</sup>) between the two models (CESM1 and MPI-ESM) and sea-ice extent (in million km<sup>2</sup>) from satellite data (obtained from the National Snow & Ice Data Center website) for the Northern Hemisphere and for around Greenland (see mask in Figure 1) for annual, summer and winter areas, over the period between 1979 – 2000 CE.
