# Supplementary material for: Sea ice variations and trends during the Common Era in the Atlantic sector of the Arctic Ocean
Source: Copernicus journal article supplement (doi:10.5194/egusphere-2023-1327), 2023-07-07

# Winter (year maximum)

## PC 1 / EOF 1

## PC 2 / EOF 2

CESM 1

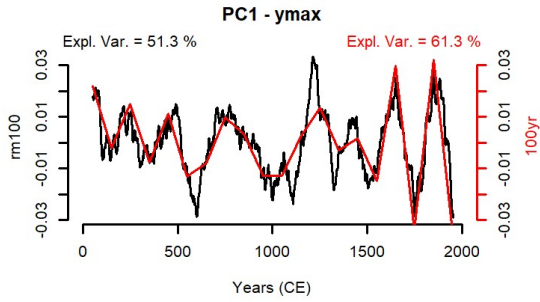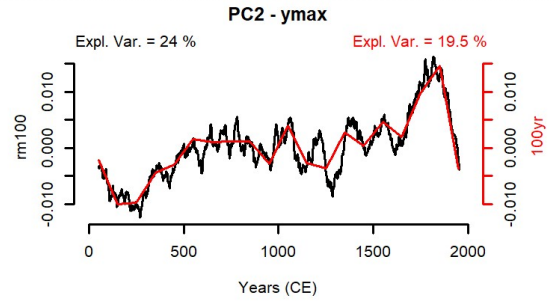

EOF 1 - ymax

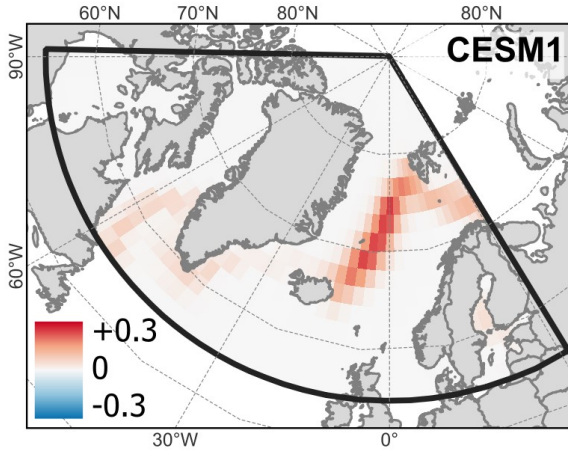

EOF 2 - ymax

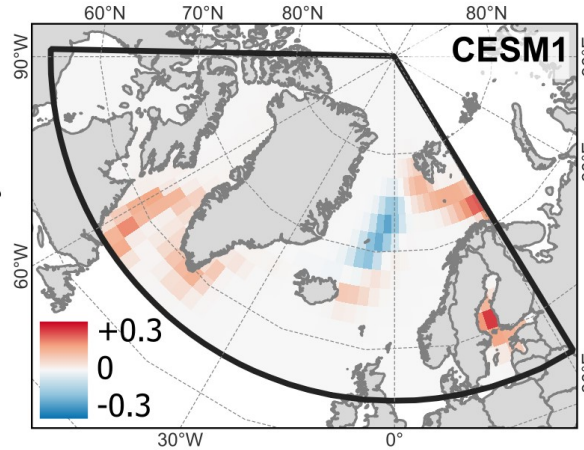

MPI-ESM

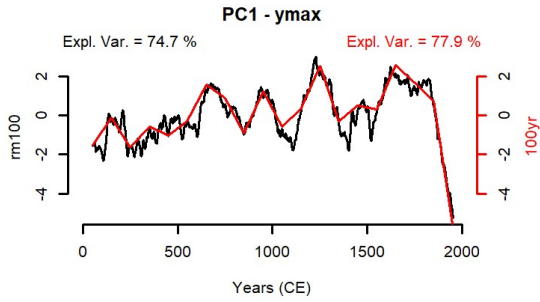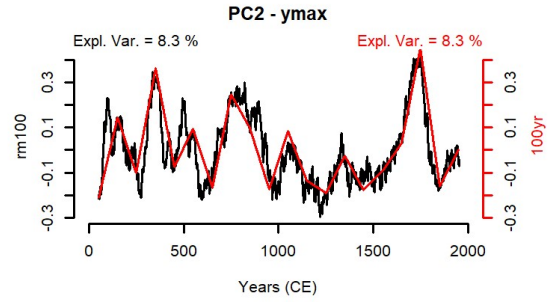

EOF 1 - ymax

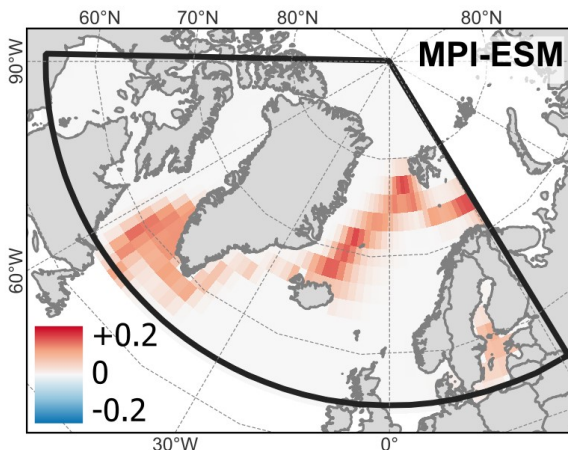

EOF 2 - ymax

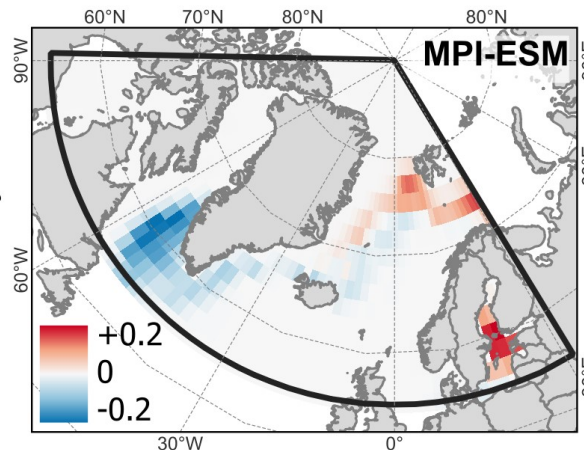

Supplement: Supplementary file [file egusphere-2023-1327-AC3-supplement.pdf]
